# Supplementary material for: The modular mechanism of chromocenter formation in Drosophila
Source: eLife. 2019 Feb 11;8:e43938. doi: 10.7554/eLife.43938 (PMC6382350; doi:10.7554/eLife.43938)
Supplement: Figure 1—source data 1. [file elife-43938-fig1-data1.xlsx]

## Sheet: Sheet1
Control	prodk08810/U
2	3
2	3
2	4
2	5
2	2
2	4
2	1
1	1
2	4
2	3
1	2
2	1
2	4
2	2
2	3
2	4
2	3
2	4
3	3
1	2
1	2
2	2
1	4
2	3
2	2
2	3
2	2
2	3
2	3
2	4
2	3
2	2
2	1
2	1
3	2
1	3
1	3
3	2
2	2
1	3
2	3
2	1
1	2
2	3
2	4
2	3
2	4
2	2
1	2
1	1
2	3
2	2
2	1
1	3
1	5
1	2
2	2
2	1
2	3
2	3
1	2
1	5
2	3
2	3
2	3
2	2
2	4
1	2
2	2
2	3
	3
