# Supplementary material for: The modular mechanism of chromocenter formation in Drosophila
Source: eLife. 2019 Feb 11;8:e43938. doi: 10.7554/eLife.43938 (PMC6382350; doi:10.7554/eLife.43938)
Supplement: Figure 1—source data 2. [file elife-43938-fig1-data2.xlsx]

## Sheet: # of AATAACATAG foci
Control	nos>prodRNAi
3	4
2	3
2	4
1	2
5	1
4	3
2	3
3	3
1	3
1	4
1	4
3	3
2	3
3	3
1	4
3	3
3	3
4	2
3	5
2	4
2	5
4	3
2	3
2	3
1	3
2	4
2	4
1	3
4	4
1	3
2	3
2	4
2	4
3	2
3	3
2	3
2	4
2	3
2	3
3	5
2	4
1	3
2	4
1	3
2	5
2	4
3	3
2	4
2	3
2	3
2	3
3	4
3	3
1	4
3	4
2	3
1	3
3	3
1	3
3	3
3	2
2	3
2	3
2	4
1	3
3	3
2	2
2	4
2	3
2	3
3	3
2	4
2	4
1	4
2	3
