# Supplementary material for: The modular mechanism of chromocenter formation in Drosophila
Source: eLife. 2019 Feb 11;8:e43938. doi: 10.7554/eLife.43938 (PMC6382350; doi:10.7554/eLife.43938)
Supplement: Figure 2—figure supplement 1—source data 1. [file elife-43938-fig2-figsupp1-data1.xlsx]

## Sheet: Sheet1
0-4d Control	0-4d nos>prodRNAi	14-18d Control	14-18d nos>prodRNAi
8	10	6	8
7	9	7	5
9	7	8	4
8	11	7	8
8	11	7	6
11	9	7	7
8	11	7	7
9	7	7	5
9	8	9	8
9	8	6	6
10	7	7	4
10	10	5	5
7	7	8	6
13	7	10	4
11	7	9	6
8	6	6	7
8	7	7	6
9	8	7	6
8	7		6
8	8		10
11	10		6
9	9		5
8	8		7
10	9		9
8	6		6
10	7		7
	6		7
	7		8
	6		8
	6		5
	6		6
	7		7
	6		6
	9		6
	11		6
	8		8
	8		6
	7		6
	8		6
	11
	7
	10
	7
	8
	6
	7
	7
	9
	8
	8
