# Supplementary material for: The modular mechanism of chromocenter formation in Drosophila
Source: eLife. 2019 Feb 11;8:e43938. doi: 10.7554/eLife.43938 (PMC6382350; doi:10.7554/eLife.43938)
Supplement: Figure 2—figure supplement 2—source data 1. [file elife-43938-fig2-figsupp2-data1.xlsx]

## Sheet: Sheet1
Imaginal Disc	MN	No MN
Control	0	360
D1 mutant	5	342
Lymph	MN	No MN
Control	0	215
D1 mutant	1	209
