# Supplementary material for: The modular mechanism of chromocenter formation in Drosophila
Source: eLife. 2019 Feb 11;8:e43938. doi: 10.7554/eLife.43938 (PMC6382350; doi:10.7554/eLife.43938)
Supplement: Figure 2—source data 1. [file elife-43938-fig2-data1.xlsx]

## Sheet: Sheet1
Discs		Lymph
Control (n=744)	prodk08810/U (n=501)	Control (n=664)	prodk08810/U (n=345)
0.36	27	1.42	12.58
0.54	29.5	1.08	23.95
0	18.23	0	22.64
0.79	21.05
