# Supplementary material for: The modular mechanism of chromocenter formation in Drosophila
Source: eLife. 2019 Feb 11;8:e43938. doi: 10.7554/eLife.43938 (PMC6382350; doi:10.7554/eLife.43938)
Supplement: Figure 2—source data 2. [file elife-43938-fig2-data2.xlsx]

## Sheet: Sheet1
Control, tub>UAS-DIAP1 (n=577)	prodk08810/U, tub>UAS-DIAP1 (n=278)
2.4	30.8
7.2	33.6
5.8	53.2
Numbers refer to % cells with >= 1 g-H2Av foci
