# Supplementary material for: The modular mechanism of chromocenter formation in Drosophila
Source: eLife. 2019 Feb 11;8:e43938. doi: 10.7554/eLife.43938 (PMC6382350; doi:10.7554/eLife.43938)
Supplement: Figure 2—source data 3. [file elife-43938-fig2-data3.xlsx]

## Sheet: Sheet1
Control, tub>UAS-DIAP1 (n=330)	prodk08810/U, tub>UAS-DIAP1 (n=216)
1.6	36.9
3	31.4
2.8	28.6
Numbers refer to % cells with >= 1 g-H2Av foci
