# Supplementary material for: The modular mechanism of chromocenter formation in Drosophila
Source: eLife. 2019 Feb 11;8:e43938. doi: 10.7554/eLife.43938 (PMC6382350; doi:10.7554/eLife.43938)
Supplement: Figure 4—figure supplement 2—source data 2. [file elife-43938-fig4-figsupp2-data2.xlsx]

## Sheet: Sheet1
Control	nos>prodRNAi
4	3
3	7
6	3
4	3
4	6
4	7
5	6
4	5
3	4
4	6
5	8
5	8
4	7
4	6
5	6
4	6
4	6
4	8
5	12
5	5
5	5
5	6
4	7
6	5
6	7
5	5
4	4
5	6
5	5
6	8
