# Supplementary material for: The modular mechanism of chromocenter formation in Drosophila
Source: eLife. 2019 Feb 11;8:e43938. doi: 10.7554/eLife.43938 (PMC6382350; doi:10.7554/eLife.43938)
Supplement: Figure 4—figure supplement 2—source data 3. [file elife-43938-fig4-figsupp2-data3.xlsx]

## Sheet: Sheet1
Control	D1 mutant
2	7
3	3
2	2
5	2
2	3
2	3
3	3
3	5
4	2
2	2
3	4
2	3
2	3
2	4
2	2
4	2
1	3
4	4
3	7
3	4
5	6
3	4
4	4
2	4
4	5
3	4
2	9
2	3
3	4
4	4
2	3
4	3
3	3
3	3
4	6
5	4
3	5
4	4
3	6
3	3
5
3
3
2
3
