# Supplementary material for: The modular mechanism of chromocenter formation in Drosophila
Source: eLife. 2019 Feb 11;8:e43938. doi: 10.7554/eLife.43938 (PMC6382350; doi:10.7554/eLife.43938)
Supplement: Figure 4—figure supplement 2—source data 4. [file elife-43938-fig4-figsupp2-data4.xlsx]

## Sheet: Sheet1
D1LL03310/+	D1LL03310/Df
2	3
2	3
2	4
1	3
2	3
2	3
3	3
3	4
3	4
2	3
2	3
2	2
1	5
3	2
2	2
1	3
2	2
1	4
1	3
2	2
2	3
2	3
2	3
2	4
4	3
4	4
1	4
4	3
3	3
3	2
1	3
1	3
3	4
2	3
1	3
2	4
2	4
2	3
3	3
2	3
2	3
2	3
2	4
1	3
2	2
2	2
2	5
2	4
2	3
2	3
1	2
3	4
3	3
4	4
2	3
1	2
2	5
3	4
2	3
2	4
1	3
2	3
2	3
2	5
1	3
1	4
2	3
2	3
3	2
2	2
2	5
2	3
1	4
2	2
2	3
