# Supplementary material for: The modular mechanism of chromocenter formation in Drosophila
Source: eLife. 2019 Feb 11;8:e43938. doi: 10.7554/eLife.43938 (PMC6382350; doi:10.7554/eLife.43938)
Supplement: Figure 4—source data 1. [file elife-43938-fig4-data1.xlsx]

## Sheet: Sheet1
X pixel	Y pixel
57.43	126.029
60.328	121.698		t=20s intervals
59.724	116.495
61.263	124.335
55.441	124.592
60.026	131.652
61.631	130.559
59.507	126.211
59.235	121.681
61.211	119.128
61.443	118.57
65.493	119.348
65.937	122.839
65.063	127.396
66.05	123.584
64.951	125.203
64.579	129.059
68.388	125.193
66.111	125.971
63.032	124.677
61.43	123.25
65.654	125.834
67.804	127.847
71.953	127.607
71.193	123.219
72.672	120.974
75.167	125.394
74.464	128.319
71.858	128.337
70.978	125.53
72.572	123.131
71.267	122.374
73.45	124.694
