# Supplementary material for: The modular mechanism of chromocenter formation in Drosophila
Source: eLife. 2019 Feb 11;8:e43938. doi: 10.7554/eLife.43938 (PMC6382350; doi:10.7554/eLife.43938)
Supplement: Figure 4—source data 2. [file elife-43938-fig4-data2.xlsx]

## Sheet: Sheet1
X pixel	Y pixel
118.418	137.699
117.439	144.489		t=20s intervals
119.578	147.607
117.686	146.354
119.735	144.736
121.211	139.673
120.833	136.28
123.414	144.28
124.158	141.543
123.722	136.663
125.399	139.79
125.417	142.98
124.907	141.38
127.206	141.369
126.984	141.748
125.187	136.032
124.71	135.99
124.539	135.874
125.418	138.578
123.666	138.743
125.265	142.015
123.515	143.369
127.558	146.12
132.395	142.549
137.472	141.364
137.064	136.344
136.987	132.669
131.478	134.554
128.574	137.052
130.516	140.713
132.892	141.542
135.999	138.01
138.279	131.609
139.053	133.691
142.201	138.372
141.945	138.817
