# Supplementary material for: The modular mechanism of chromocenter formation in Drosophila
Source: eLife. 2019 Feb 11;8:e43938. doi: 10.7554/eLife.43938 (PMC6382350; doi:10.7554/eLife.43938)
Supplement: Figure 4—source data 3. [file elife-43938-fig4-data3.xlsx]

## Sheet: Sheet1
Diffusion co-efficient values
D1	Prod
0.00216	0.00438
0.000268	0.00191
0.00271	0.00152
0.00679	0.013
0.00115	0.00241
0.00189	0.00246
0.00112	0.0014
0.00208	0.00042
0.000914	0.000926
0.0014	0.000666
0.0143	0.00337
0.00379	0.00206
0.0158	0.00175
0.000846	0.00558
0.00049	0.00435
0.00228	4e-05
0.000568	0.000748
0.00219	0.0015
0.00348	0.00292
0.00702	0.000855
0.0148	0.000809
0.012	0.0132
0.00315	0.000884
0.000531	0.014
0.0685	0.00143
	0.00871
0.00438	0.0145
0.00191	0.0056
0.00152	0.00798
0.013
0.00241
0.00246
0.0014
0.00042
0.000926
0.000666
0.00337
0.00206
0.00175
0.00558
0.00435
4e-05
0.000748
0.0015
0.00292
0.000855
0.000809
0.0132
0.000884
0.014
0.00143
0.00871
0.0145
0.0056
0.00798
