# Supplementary material for: The modular mechanism of chromocenter formation in Drosophila
Source: eLife. 2019 Feb 11;8:e43938. doi: 10.7554/eLife.43938 (PMC6382350; doi:10.7554/eLife.43938)
Supplement: Figure 4—source data 5. [file elife-43938-fig4-data5.xlsx]

## Sheet: Sheet1
Frame	Inter-particle distance			Frame	Prod Traj. 1 X	D1 Traj. 25 X	DX	DX^2	Frame	Prod Traj. 1 Y	D1 Traj. 25 Y	DY	DY^2	Particle Distance
0:00:20	8.38695			5	45.713	44.288	1.425	2.03063	5	58.462	66.727	-8.265	68.3102	8.38695
0:00:40	9.40786			6	42.389	42.516	-0.127	0.016129	6	51.625	61.032	-9.407	88.4916	9.40786
0:01:00	9.61145			7	43.278	42.037	1.241	1.54008	7	47.277	56.808	-9.531	90.84	9.61145
0:01:20				9	43.617	43.651	-0.034	0.001156	9	62.68	70.675	-7.995	63.92	7.99507
0:01:40	7.99507			10	45.341	43.937	1.404	1.97122	10	62.277	68.873	-6.596	43.5072	6.74377
0:02:00	6.74377			11	42.009	40.404	1.605	2.57602	11	66.454	72.158	-5.704	32.5356	5.92551
0:02:20	5.92551			12	40.398	39.628	0.77	0.5929	12	68.74	74.31	-5.57	31.0249	5.62297
0:02:40	5.62297			13	41.757	40.588	1.169	1.36656	13	69.96	73.488	-3.528	12.4468	3.71663
0:03:00	3.71663			14	41.781	39.982	1.799	3.2364	14	67.828	73.014	-5.186	26.8946	5.48917
0:03:20	5.48917			15	39.372	36.491	2.881	8.30016	15	66.539	71.452	-4.913	24.1376	5.69541
0:03:40	5.69541			16	45.709	40.386	5.323	28.3343	16	66.92	71.481	-4.561	20.8027	7.00978
0:04:00	7.00978			17	47.017	44.176	2.841	8.07128	17	63.709	69.587	-5.878	34.5509	6.52857
0:04:20	6.52857			18	47.095	42.782	4.313	18.602	18	62.522	67.696	-5.174	26.7703	6.73589
0:04:40	6.73589			19	46.519	38.928	7.591	57.6233	19	63.512	69.217	-5.705	32.547	9.4958
0:05:00	9.4958			20	43.982	41.282	2.7	7.29	20	60.689	66.587	-5.898	34.7864	6.48663
0:05:20	6.48663			21	45.646	42.438	3.208	10.2913	21	61.299	66.412	-5.113	26.1428	6.03606
0:05:40	6.03606			22	46.31	43.532	2.778	7.71728	22	62.653	69.162	-6.509	42.3671	7.07703
0:06:00	7.07703			23	45.707	42.277	3.43	11.7649	23	62.509	69.047	-6.538	42.7454	7.38311
0:06:20	7.38311			24	48.32	41.661	6.659	44.3423	24	63.145	70.255	-7.11	50.5521	9.74137
0:06:40	9.74137			25	47.571	41.582	5.989	35.8681	25	61.147	69.278	-8.131	66.1132	10.0986
0:07:00	10.0986			26	47.203	43.965	3.238	10.4846	26	63.1	70.106	-7.006	49.084	7.71807
0:07:20	7.71807			27	44.55	40.013	4.537	20.5844	27	59.611	65.561	-5.95	35.4025	7.48244
0:07:40	7.48244			28	43.429	37.509	5.92	35.0464	28	62.099	66.777	-4.678	21.8837	7.5452
0:08:00	7.5452			29	44.419	40.576	3.843	14.7686	29	61.346	66.252	-4.906	24.0688	6.23197
0:08:20	6.23197			30	48.081	44.057	4.024	16.1926	30	60.698	63.983	-3.285	10.7912	5.19459
0:08:40	5.19459			31	46.258	42.884	3.374	11.3839	31	60.334	65.393	-5.059	25.5935	6.0809
0:09:00	6.0809			32	46.678	41.557	5.121	26.2246	32	62.696	67.56	-4.864	23.6585	7.0628
0:09:20	7.0628			33	46.637	41.987	4.65	21.6225	33	60.544	65.087	-4.543	20.6388	6.50087
0:09:40	6.50087			34	48.712	42.042	6.67	44.4889	34	60.496	64.267	-3.771	14.2204	7.6622
0:10:00	7.6622			35	44.535	40.418	4.117	16.9497	35	56.085	65.238	-9.153	83.7774	10.0363
0:10:20	10.0363			36	44.506	38.913	5.593	31.2816	36	58.4	63.967	-5.567	30.9915	7.89133
0:10:40	7.89133			37	46.121	40.05	6.071	36.857	37	56.793	60.377	-3.584	12.8451	7.04997
0:11:00	7.04997			38	47.841	42.36	5.481	30.0414	38	52.913	54.725	-1.812	3.28334	5.77276
0:11:20	5.77276
