# Supplementary material for: The modular mechanism of chromocenter formation in Drosophila
Source: eLife. 2019 Feb 11;8:e43938. doi: 10.7554/eLife.43938 (PMC6382350; doi:10.7554/eLife.43938)
Supplement: Figure 4—source data 6. [file elife-43938-fig4-data6.xlsx]

## Sheet: Sheet1
Control	prodk08810/U
1	2
3	2
1	2
3	6
1	5
1	4
2	3
2	5
1	2
2	5
2	2
2	4
2	4
3	3
2	4
3	2
2	3
2	3
3	6
2	4
1	3
2	4
1	12
1	4
2	5
3	4
3	5
4	6
3	5
3	8
2	4
2	6
4	6
4	8
4	6
2	5
3	7
2	7
3	5
2	6
4	7
4	8
3	6
1	8
2	4
2	7
3	7
3	5
2	3
2	5
2	7
3	3
2	6
3	4
3	8
3	8
2	7
2	7
3	8
3	5
2	6
1	6
2	5
2	6
1	6
2
2
3
3
3
2
2
