# Supplementary material for: The modular mechanism of chromocenter formation in Drosophila
Source: eLife. 2019 Feb 11;8:e43938. doi: 10.7554/eLife.43938 (PMC6382350; doi:10.7554/eLife.43938)
Supplement: Figure 4—source data 7. [file elife-43938-fig4-data7.xlsx]

## Sheet: Sheet1
Control	D1 mutant
2	4
1	3
1	4
1	2
1	3
2	3
2	3
1	2
2	2
2	3
2	2
3	2
1	2
1	4
2	3
1	4
2	3
2	1
2	2
2	2
2	3
2	4
2	4
2	2
2	2
2	1
2	2
2	2
2	3
3	3
3	2
2	2
3	2
3	2
2	4
1	4
4	3
2	3
2	3
2	4
2	2
2	2
3	3
2	4
1	3
2	3
4	2
2	2
3	3
3	3
3	3
3	6
3	3
3	3
2	4
2	4
3	2
2	2
2	3
1	3
3	4
2	2
2	3
	3
	4
	3
