# Supplementary material for: The modular mechanism of chromocenter formation in Drosophila
Source: eLife. 2019 Feb 11;8:e43938. doi: 10.7554/eLife.43938 (PMC6382350; doi:10.7554/eLife.43938)
Supplement: Figure 5—source data 1. [file elife-43938-fig5-data1.xlsx]

## Sheet: Sheet1
	GFP+ larvae	GFP- larvae
+/CyOGFP; +/TM3,SerGFP	165	18
prodk08810/CyOGFP; D1LL03310/TM3,SerGFP	532	8
